# Supplementary material
Source: PubMed Central journal article supplement (PMC5363189)
Supplement: mmc2.pdf [file mmc2.pdf]

# Intra-articular Delivery of Antago-miR-483-5p Inhibits Osteoarthritis by Modulating Matrilin 3 and Tissue Inhibitor of Metalloproteinase 2

Hua Wang,<sup>1,3,6</sup> Haiyan Zhang,<sup>2,6</sup> Qiuyi Sun,<sup>1</sup> Yun Wang,<sup>1</sup> Jun Yang,<sup>1</sup> Jincheng Yang,<sup>4</sup> Tao Zhang,<sup>4</sup> Shenqiu Luo,<sup>1</sup> Liping Wang,<sup>5</sup> Yu Jiang,<sup>5</sup> Chun Zeng,<sup>2</sup> Daozhang Cai,<sup>2</sup> and Xiaochun Bai<sup>2</sup>

<sup>1</sup>State Key Laboratory of Organ Failure Research, Department of Cell Biology, School of Basic Medical Science, Southern Medical University, Guangzhou 510515, China; <sup>2</sup>Academy of Orthopedics, Guangdong Province, The Third Affiliated Hospital, Southern Medical University, Guangzhou 510630, China; <sup>3</sup>Key Laboratory of Tropical Diseases and Translational Medicine of The Ministry of Education, Hainan Medical College, Haikou 571199, China; <sup>4</sup>Department of Orthopedics, General Hospital of Guangzhou Military Command of PLA, Guangzhou 510010, China; <sup>5</sup>Department of Pharmacology and Chemical Biology, University of Pittsburgh School of Medicine, Pittsburgh, PA 15213, USA

**MicroRNAs (miRNAs) are emerging as important regulators in osteoarthritis (OA) pathogenesis. In our study, a real-time PCR assay revealed that miR-483-5p was upregulated in articular cartilage from OA patients and experimental OA mice induced by destabilization of the medial meniscus compared to their controls. Overexpression of miR-483-5p by intra-articular injection of lentivirus LV3-miR-483-5p significantly enhanced the severity of experimental OA. Consequently, we synthesized antago-miR-483-5p to silence the endogenous miR-483-5p and delivered it intra-articularly, which revealed that antago-miR-483-5p delayed the progression of experimental OA. To investigate the functional mechanism of miR-483-5p in OA development, we generated doxycycline-inducible miR-483 transgenic (TG483) mice. TG483 mice exhibited significant acceleration and increased severity of OA, and age-related OA occurred with higher incidence and greater severity in TG483 mice compared with their controls. Furthermore, our results revealed miR-483-5p directly targeted to the cartilage matrix protein matrilin 3 (Matn3) and tissue inhibitor of metalloproteinase 2 (Timp2) to stimulate chondrocyte hypertrophy, extracellular matrix degradation, and cartilage angiogenesis, and it consequently initiated and accelerated the development of OA. In conclusion, our findings reveal an miRNA functional pathway important for OA development. Targeting of miR-483-5p by intra-articular injection of antago-miR-483-5p represents an approach that could prevent the onset of OA and delay its progression.**

## INTRODUCTION

Osteoarthritis (OA) is a highly prevalent and degenerative joint disorder. Destruction of cartilage, loss of cartilage matrix, aberrant chondrocyte hypertrophy,<sup>1,2</sup> and disruption of the tidemark accompanied by angiogenesis at the osteochondral junction<sup>3</sup> are characteristics of OA. Unfortunately, no effective medical therapy for the condition is available for clinical use because of limited understanding of its pathogenesis.<sup>4</sup> Chondrocytes are the only resident cells

found in cartilage,<sup>5</sup> and their primary function is to maintain cartilage homeostasis. However, during the initiation and development of OA, changes occur in chondrocyte behavior,<sup>1</sup> such as expression of hypertrophy markers and secretion of disease-associated cytokines or small fragments of nucleic acid, such as microRNAs (miRNAs).

miRNAs are a class of non-coding single-stranded RNAs acting on “fine-tuning” gene expression at the post-transcriptional level.<sup>6</sup> The emerging role of miRNAs in OA is evident from studies comparing miRNA expression in both OA and normal articular tissues. miRNAs, including miR-140,<sup>7,8</sup> miR-320c,<sup>9</sup> miR-125b,<sup>10</sup> miR-27b,<sup>11</sup> miR-194,<sup>12</sup> miR-199a\*,<sup>13</sup> miR-34a,<sup>14</sup> and miR-146a,<sup>15</sup> are implicated in various aspects of OA pathology, including regulating proteolytic enzymes, chondrocyte metabolism, and cartilage homeostasis and responding to the inflammatory microenvironment. Therefore, identification of the miRNAs regulatory network involved in OA is crucial for understanding its pathogenesis. miR-483 is a multifunctional miRNA that regulates cell proliferation, differentiation, and migration in adipocytes,<sup>16,17</sup> pancreatic beta cells,<sup>18</sup> and various tumor cells.<sup>19–21</sup> Recently, miR-483-5p was reported to be upregulated in chondrocytes from OA patients,<sup>22,23</sup> as well as in cartilage from OA and old mice compared with their controls.<sup>24</sup> However, the functional

Received 22 November 2015; accepted 25 December 2016;  
<http://dx.doi.org/10.1016/j.ymthe.2016.12.020>.

<sup>6</sup>These authors contributed equally to this work.

**Correspondence:** Xiaochun Bai, Academy of Orthopedics, Guangdong Province, The Third Affiliated Hospital, Southern Medical University, Guangzhou 510630, China.

**E-mail:** [baixc15@smu.edu.cn](mailto:baixc15@smu.edu.cn)

**Correspondence:** Daozhang Cai, Academy of Orthopedics, Guangdong Province, The Third Affiliated Hospital, Southern Medical University, Guangzhou 510630, China.

**E-mail:** [dao Zhang@medmail.com.cn](mailto:dao Zhang@medmail.com.cn)

**Correspondence:** Chun Zeng, Academy of Orthopedics, Guangdong Province, The Third Affiliated Hospital, Southern Medical University, Guangzhou 510630, China.

**E-mail:** [zengdavid@126.com](mailto:zengdavid@126.com)

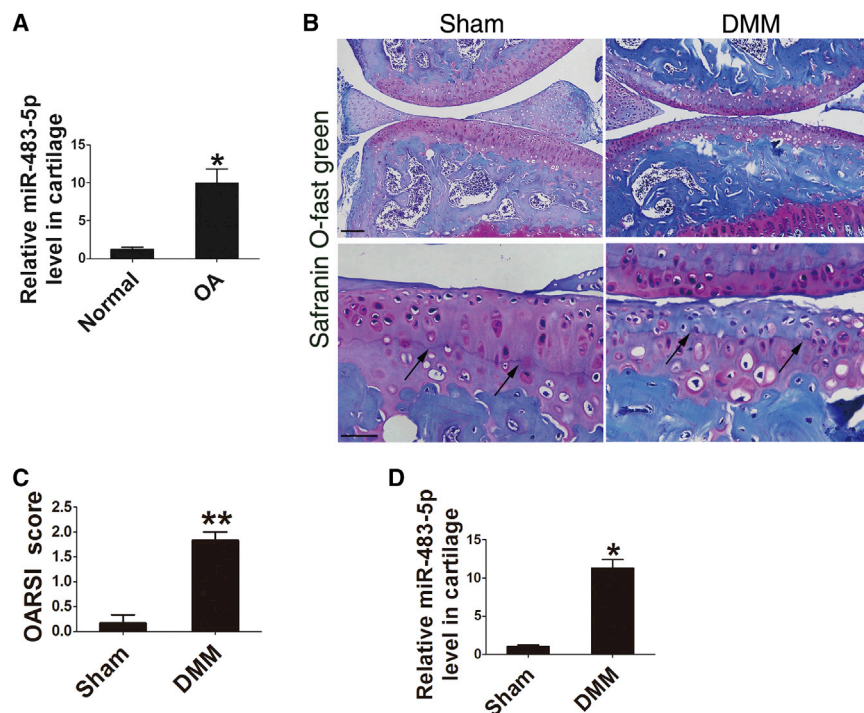

**Figure 1. Expression of miR-483-5p Is Elevated in the Articular Cartilage of OA Patients and Experimental OA Mice**

(A) Real-time PCR analysis of miR-483-5p levels in human OA articular cartilage compared to controls. (B) Safranin O fast green staining of knee joints from DMM and sham mice. Black arrows indicate the tidemark. Scale bars represent 100  $\mu\text{m}$  (top) and 40  $\mu\text{m}$  (bottom). (C) OARSI scores according to safranin O and fast green staining in (B) ( $n = 5$ ). (D) Real-time PCR analysis showed a significant increase in the levels of miR-483-5p in mouse OA articular cartilage ( $n = 5$ ) compared to the sham surgery group ( $n = 5$ ). Error bars represent the mean  $\pm$  SEM. \* $p < 0.05$ ; \*\* $p < 0.01$  (independent-sample t test for two groups and one-sample t test for real-time PCR analysis).

role of miR-483-5p in OA development and the mechanisms through which miR-483-5p controls the fate of chondrocytes and regulates the pathogenesis of OA are not known.

In this study, we demonstrate that miR-483-5p expression is enhanced both in cartilage of OA patients and experimental OA mice. Overexpression of miR-483-5p in mice results in OA-like features, including aberrant hypertrophy of chondrocytes, enhanced cartilage angiogenesis, matrix degradation, and accelerated OA. Inhibition of miR-483-5p by intra-articular injection of synthetic antago-miR-483-5p delays OA development in mice. Furthermore, we identified matrilin 3 (Matn3) and tissue inhibitor of metalloproteinase 2 (Timp2) as the functional targets of miR-483-5p in OA development. Our findings provide direct evidence of the role of miR-483-5p in OA and support the hypothesis that the miR-483-5p inhibitor antago-miR-483-5p delays the development of OA.

## RESULTS

### miR-483-5p Expression Is Increased in the Cartilage of Patients with OA and in Mice with Experimental OA

To investigate the potential role of miR-483-5p in OA, we collected OA articular cartilage samples (Figure S1A) from patients during total knee replacement surgery and samples of healthy human articular cartilage from victims of road traffic accidents. Real-time PCR analysis showed enhanced expression of miR-483-5p in human OA cartilage compared with that in normal cartilage (Figure 1A). Furthermore, an experimental model of OA was induced in 8- to 10-week-old male C57BL/6J mice by surgical destabilization of the

medial meniscus (DMM) (Figures 1B and 1C), a model that was previously established in our lab.<sup>25</sup> 5 weeks after surgery, articular cartilage was isolated,<sup>26</sup> and the expression of miR-483-5p was found to be significantly upregulated in DMM OA mice compared with that in sham-operated mice (Figure 1D). These findings demonstrate that the upregulation of miR-483-5p in articular chondrocytes of patients and OA mice correlates with OA development.

### Overexpression of miR-483-5p in Cartilage Promotes OA Development in Mice

To determine whether miR-483-5p overexpression promotes OA development, lentivirus-mediated miR-483-5p (LV3-miR-483-5p) and comparable amounts of LV3-NC (negative control) were injected intra-articularly at 7 and 14 days after DMM surgery. Immunofluorescence analysis of GFP expression demonstrated that intra-articular injection of lentiviruses mainly affects chondrocytes in the middle zone and deep zone, above the calcified layers (Figure S2A). Fluorescence in situ hybridization (FISH) analysis showed that levels of miR-483-5p were increased 3- to 4-fold in samples of miR-483-5p-overexpressing cartilage (Figure 2A), demonstrating successful upregulation of miR-483-5p by the LV3-miR-483-5p lentivirus.

Interestingly, OA progression was significantly accelerated by cartilage overexpression of miR-483-5p in DMM OA mice. H&E staining showed that the tidemark moved closer to the articular surface in DMM mice after intra-articular injection of LV3-miR-483-5p than after injection of LV3-NC in DMM mice (Figures 2B and 2C). Safranin O and fast green staining (Figure 2B) showed accelerated destruction of cartilage and loss of proteoglycan as well as enhanced chondrocyte hypertrophic differentiation in the tibial cartilage of LV3-miR-483-5p-treated mice. Accordingly, Osteoarthritis Research Society International (OARSI)<sup>27</sup> scores were significantly increased (Figure 2D) in these mice. Furthermore, compared with control mice, expression of Runx2 (Runt-related transcription factor 2), an

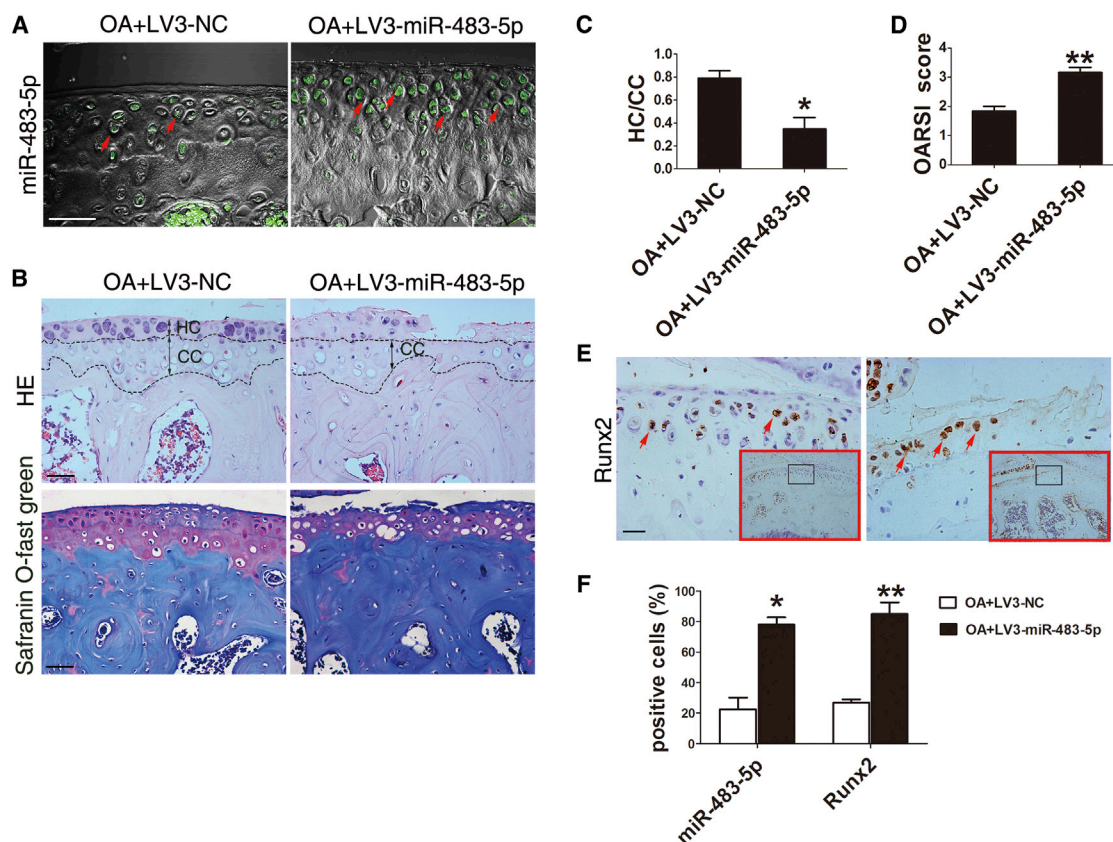

**Figure 2. High miR-483-5p Expression in Cartilage Correlates with Accelerated OA Development**

(A) Fluorescence in situ hybridization analysis of miR-483-5p (green) in the tibial plateau of DMM OA mice ( $n = 10$ ) injected with lentivirus-mediated miR-483-5p or NC (negative control). Scale bar, 40  $\mu\text{m}$ . (B) Top: H&E staining of cartilage. The hyaline cartilage (HC) and calcified cartilage (CC) thicknesses are indicated by double-headed arrows. Bottom, safranin O and fast green staining of sagittal sections of the tibia medial compartment, proteoglycan (red), and bone (blue). Scale bar, 50  $\mu\text{m}$ . (C) Quantification of HC/CC according to H&E staining in (B). (D) OARSI scores according to safranin O and fast green staining in (B). (E) Immunostaining analysis of positive Runx2 (brown; scale bar, 20  $\mu\text{m}$ ) cells in the tibial plateau of mice shown in (A). Red arrows indicate positively stained cells. (F) Quantification of the proportion of cells positive for miR-483-5p and Runx2 in the tibial plateau of mice shown in (A). Error bars represent the mean  $\pm$  SEM. \* $p < 0.05$ ; \*\* $p < 0.01$  (independent-sample t test for two groups).

essential transcription factor for chondrocyte hypertrophy that is associated with cartilage joint degeneration in human OA patients,<sup>28</sup> was markedly enhanced in chondrocytes after LV3-miR-483-5p treatment (Figure 2E and 2F).

Collectively, miR-483-5p expression was increased in cartilage of patients with OA as well as mice with experimental OA. OA progression was significantly accelerated due to high miR-483-5p expression in cartilage and was accompanied by severe cartilage damage, cartilage matrix degeneration, and increased chondrocyte hypertrophy.

#### Intra-articular Delivery of Synthetic Antago-miR-483-5p Delays Development of Osteoarthritis

We next examined the effects of inhibition of miR-483-5p on OA development. Intra-articular injection of antago-miR-483-5p (miR-483-5p inhibitor) significantly downregulated miR-483-5p level in cartilage chondrocytes and synovium (Figures S2B and S2C). Histologic examination revealed that antago-miR-483-5p protected against

cartilage damage and loss and reduced the amount of fibrous cartilage. Correspondingly, safranin O staining showed OARSI scores were significantly decreased in the antago-miR-483-5p-treated mice than in antago-miR-NC-injected mice (Figure 3A). Additionally, the number of Runx2-positive chondrocytes was markedly decreased in sections from antago-miR-483-5p-injected mice (Figure 3B). Hence, our data demonstrated the therapeutic effects of miR-483-5p inhibition on delaying OA cartilage destruction in a mouse model. Collectively, these loss- and gain-of-function analyses demonstrate that miR-483-5p plays an essential role in the development of OA.

#### miR-483-5p Is Essential for OA Initiation and Development

We further generated miR-483 transgenic mice (Figure S3A) to identify the role of miR-483-5p in OA initiation. The mice (TG483) carry both the pri-miR-483 transgene (Figure S3B) and rtTA inducer allele (Figure S3C). The expression of miR-483 is induced by a doxycycline (Dox) tet-on system in the TG483 mice. TG483 and control mice were both administered 2 mg/mL Dox in drinking water from 6 weeks

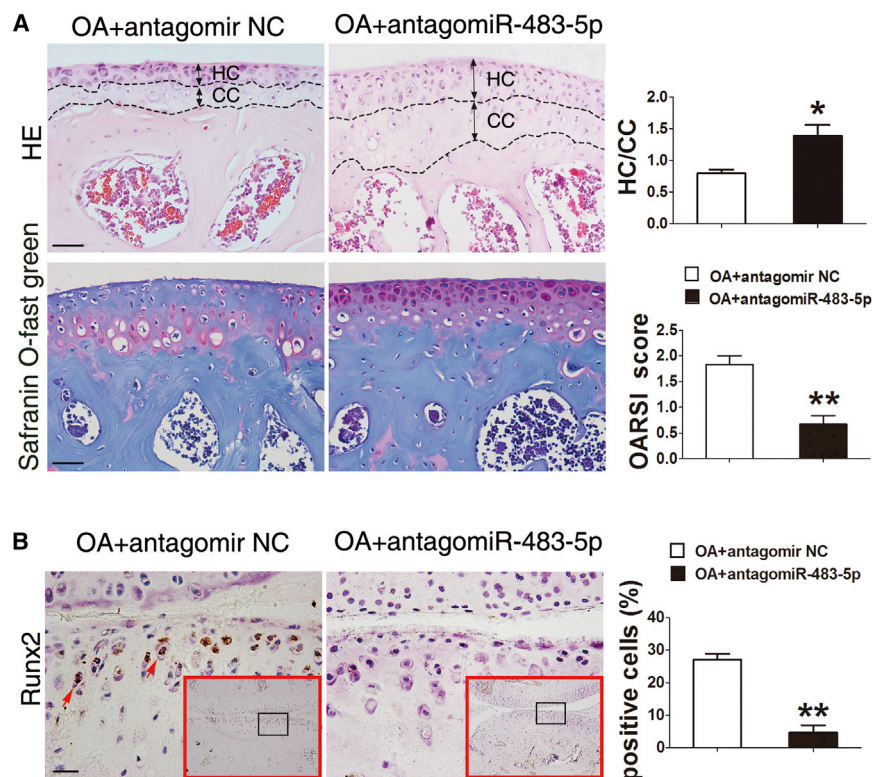

**Figure 3. Inhibition of miR-483-5p in Cartilage Delays OA Development**

(A) H&E, safranin O, and fast green staining and quantification of hyaline cartilage/calcified cartilage (HC/CC) and OARS1 scores in the tibial plateau of DMM OA mice injected intra-articularly with antago-miR-483-5p or antago-miR NC (n = 10). Scale bar, 50  $\mu$ m. (B) Immunostaining and quantification of Runx2-positive (brown; scale bar, 20  $\mu$ m) cells in the tibial plateau of mice shown in (A). Red arrows indicate positively stained cells. Error bars represent the mean  $\pm$  SEM. \* $p$  < 0.05; \*\* $p$  < 0.01 (independent-sample t test for two groups).

candidate target genes, *Matn3* (Figure 5A) and *Timp2* attracted our attention. *Matn3* is an essential cartilage matrix protein secreted by chondrocytes and may inhibit premature chondrocyte hypertrophy by suppressing BMP-2/Smad1 activity.<sup>28</sup>

We performed luciferase assays to determine if *Matn3* is a target of miR-483-5p in chondrocytes. We found that miR-483-5p inhibited the luciferase activity of a reporter containing the wild-type (WT) *Matn3* 3' UTR but had no effect on the reporter with a mutated 3' UTR, which was unable to bind to miR-483-5p (Figure 5B). Moreover, although the amount of *Matn3* protein in ATDC5 cells was downregulated by miR-483-5p mimics and upregulated by inhibitor, no difference in *Matn3* mRNA levels was observed among the groups (Figure 5C). To determine whether miR-483-5p functionally targets *Matn3* in regulating OA development, primary chondrocytes were isolated and transfected with miR-483-5p mimics alone or co-transfected with miR-483-5p mimics and *Matn3*-overexpressing plasmid. We found that *Col2a1* decreased, while *Ihh* and *Runx2* mRNA levels were markedly enhanced in cells transfected with miR-483-5p mimics compared to cells transfected with NC. Importantly, *Col2a1*, *Ihh*, and *Runx2* mRNA expression were rescued to normal levels by *Matn3*-expression plasmid (Figure 5D). These results suggest that *Matn3* is a direct target of miR-483-5p in chondrocytes in vitro.

We next examined whether miR-483-5p targets *Matn3* to promote OA development in vivo. As expected, the level of *Matn3* in the cartilage of aged TG483 mice was markedly reduced compared with that in control mice (Figure 5E). To further ascertain whether increased numbers of hypertrophic chondrocytes in the cartilage of TG483 mice resulted from downregulation of *Matn3*, 8- to 10-week-old TG483 and control mice were given intra-articular injections of *Matn3*-expressing lentivirus at 7 and 14 days after DMM surgery. 5 weeks later, knee joints were harvested for histological analysis. H&E, safranin O, and fast green staining showed that cartilage formation on the tibial plateau and proteoglycan in extracellular matrix (ECM) were significantly increased in TG483 DMM mice after

of age, and the levels of miR-483-5p in articular cartilage were significantly upregulated after exposure to Dox for 2 weeks (Figure 4A). As expected, TG483 mice exhibited significant acceleration and increased severity of OA 5 weeks after DMM surgery compared to their littermate controls (Figure 4B).

Most importantly, at age 13.5 months, 100% of TG483 mice developed OA-like phenotypes, including loss of proteoglycan, degradation of cartilage matrix, and increased chondrocyte hypertrophy. In contrast, less than half of the control mice exhibited OA phenotypes, with significantly less severe grades at the same age (Figures 4C and 4D). This shows that OA is more common and severe in TG483 mice during aging. Notably, decreased *Col2a1* in cartilage of aged TG483 mice was accompanied by an increased mRNA level of Indian hedgehog (*Ihh*), a pre-hypertrophic chondrocyte-produced cytokine important for OA initiation (Figure 4E). Furthermore, our results demonstrated that miR-483-5p negatively regulated expression of *Ihh* in vivo (Figures 4F and 4G). Therefore, these data indicate that miR-483-5p is important for OA development and involved in OA initiation.

#### **Matn3 Is a Target of miR-483-5p in Chondrocytes and OA Development**

To gain further insight into the mechanism by which miR-483-5p regulates the development of OA, we used the Web-based target prediction software programs Target Scan, miRWalk, miRanda, and PITA to predict the potential targets of miR-483-5p. Among these

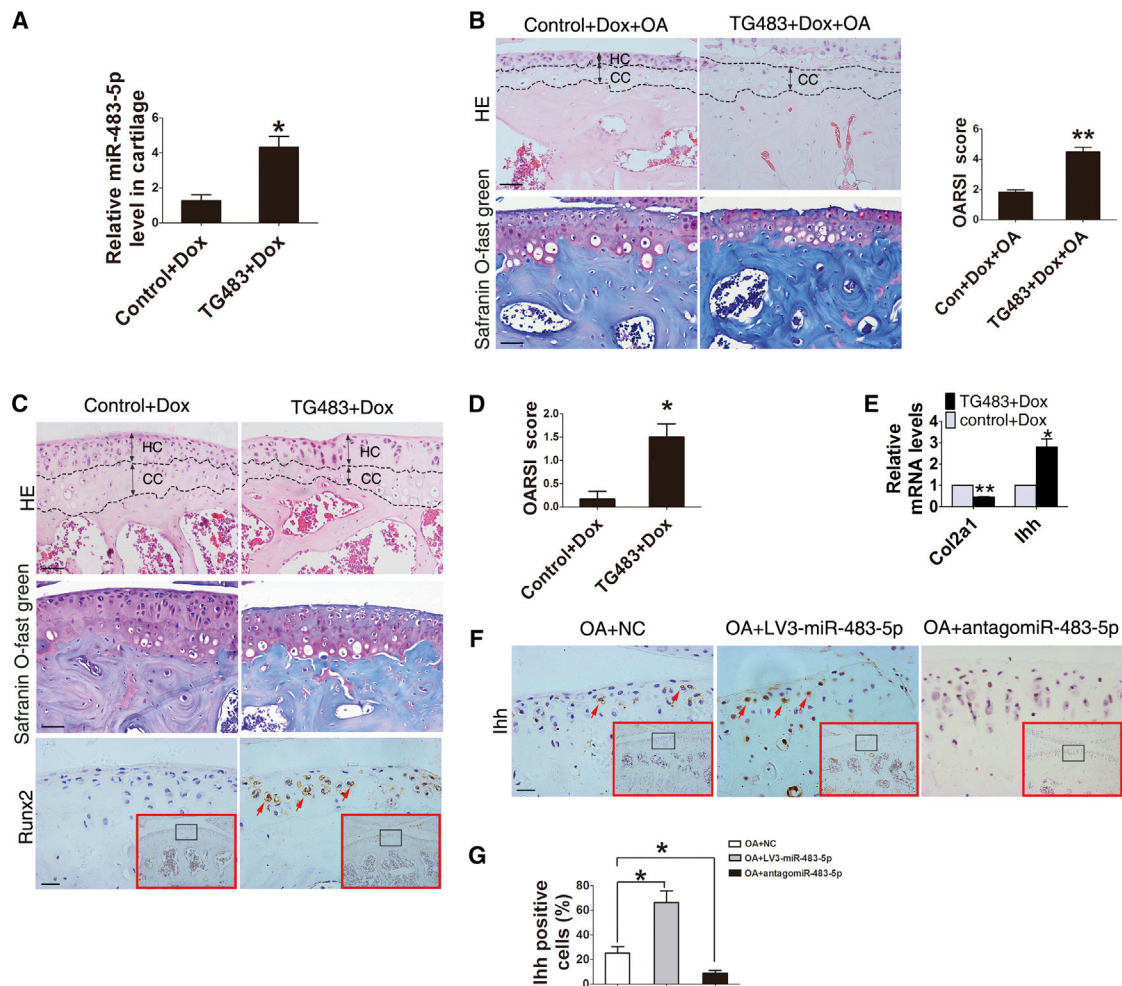

**Figure 4. miR-483-5p Is Essential for OA Initiation and Development**

(A) Real-time PCR analysis of miR-483-5p levels in cartilage (normalized to those in WT mice) from control and TG483 mice exposed to Dox for 2 weeks. (B) H&E, safranin O, and fast green staining in the tibial plateau of TG483 (n = 10) and control mice (n = 10) 5 weeks after DMM surgery. Scale bar, 50  $\mu$ m. (C) H&E, safranin O, and fast green staining (scale bar, 50  $\mu$ m) and immunostaining analysis of Runx2-positive (scale bar, 20  $\mu$ m) cells in the tibial plateau of TG483 (n = 10) and control mice (n = 8) treated with Dox for 12 months. (D) OARSI scores according to safranin O and fast green staining in (C). (E) Real-time PCR analysis of *Col2a1* and *Ihh* mRNA levels in the cartilage of mice described in (D). (F and G) Immunostaining and quantification analysis of *Ihh*-positive (brown; scale bar, 20  $\mu$ m) cells in the tibial plateau of DMM OA mice after receiving intra-articular injection of lentivirus-mediated miR-483-5p or antago-miR-483-5p. Red arrows indicate positively stained cells. Error bars represent the mean  $\pm$  SEM. \*p < 0.05; \*\*p < 0.01 (independent-sample t test for two groups and one-sample t test for real-time PCR analysis).

treatment with *Matn3*-expressing lentivirus. In contrast, levels of *Ihh* and *Runx2* were reduced in the cartilage of these mice (Figure 5F). Based on these findings, we propose that miR-483-5p-dependent chondrocyte hypertrophy and OA development are restored upon re-acquisition of *Matn3* expression. Taken together, these data demonstrate that *Matn3* is a directed and functional target of miR-483-5p in chondrocytes during OA development.

#### miR-483-5p Targets *Timp2* to Stimulate Cartilage Angiogenesis and OA Development

*Timp2*, a member of the tissue inhibitors of metalloproteinase (Timp) family, has the capacity to inhibit the catalytic activity of ma-

trix metalloproteinases (MMPs). It has been shown that *Timp2* is downregulated in OA cartilage and that *Timp2*-deficient mice develop accelerated OA.<sup>29</sup> Recent findings suggest that miR-483-5p directly targets *Timp2* (Figure 6A) in other cells.<sup>30</sup> Using a luciferase assay (Figures 6B and 6C), we confirmed that miR-483-5p directly targets *Timp2* in the ATDC5 cell line. Moreover, the amount of *Timp2* protein in ATDC5 cells was downregulated by miR-483-5p mimics and upregulated by inhibitor, and no difference in *Timp2* mRNA levels was found among these groups (Figure 6D). We next determined the role of miR-483-5p in regulating *Timp2* in vivo. The expression of *Timp2* in articular cartilage from OA patients and normal humans was examined by immunofluorescence. *Timp2*

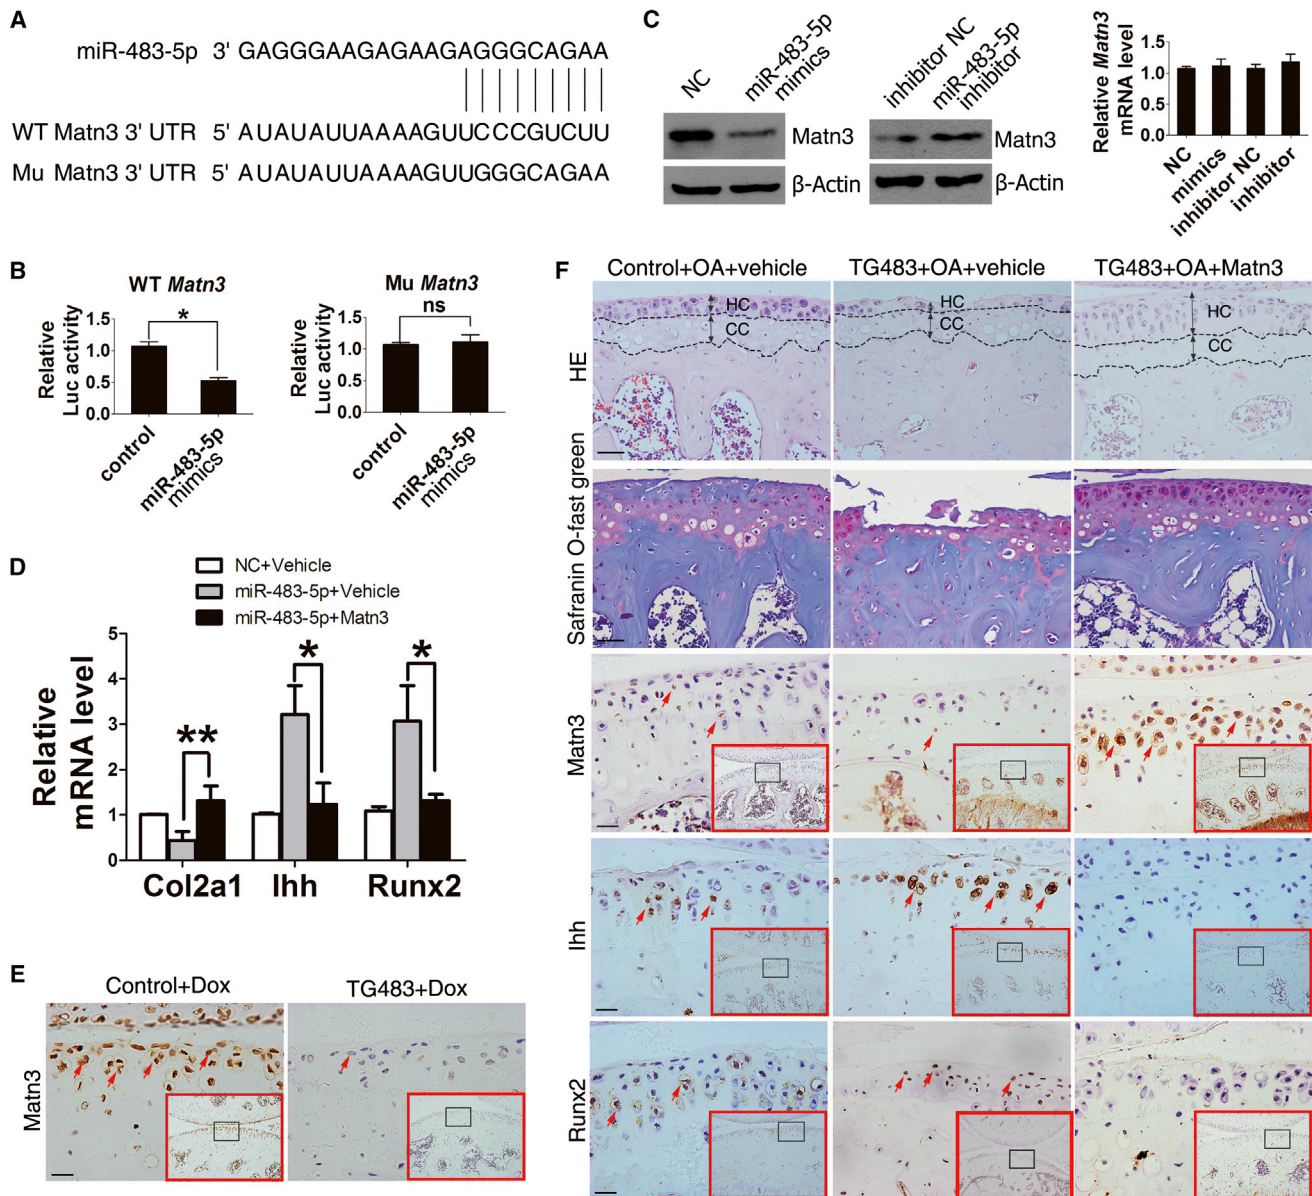

**Figure 5. miR-483-5p Directly Targets *Matn3* in Chondrocytes during OA Development**

(A) miR-483-5p aligned with the 3' UTR of *Matn3* mRNA. (B) ATDC5 cells were co-transfected with a reporter carrying a mutant or WT *Matn3* 3' UTR along with miR-483-5p mimics or its control were analyzed by luciferase assay. (C) Western blot and real-time PCR analysis of *Matn3* expression in ATDC5 cells transfected with miR-483-5p mimics or inhibitor for 48 hr. (D) Real-time PCR analysis of *Col2a1*, *Ihh*, and *Runx2* mRNA levels in primary chondrocytes transfected with NC, miR-483-5p mimics, or miR-483-5p mimics plus *Matn3* for 48 hr. (E) Immunohistochemical analysis of *Matn3*-positive cells in the tibial plateau of TG483 ( $n = 10$ ) and control mice ( $n = 8$ ) treated with 2 mg/mL Dox for 12 months. Scale bar, 20  $\mu$ m. (F) H&E, safranin O, and fast green staining and immunostaining analysis of *Matn3*-, *Ihh*-, and *Runx2*-positive cells (brown) in the tibial plateau of DMM TG483 mice with or without intra-articular injection of *Matn3*-expressing lentivirus ( $n = 10$ ). Red arrows indicate positively stained cells. Error bars represent the mean  $\pm$  SEM. \* $p < 0.05$ ; \*\* $p < 0.01$ ; ns, non-significant (independent-sample t test for two groups).

was downregulated in OA cartilage and negatively correlated with miR-483-5p level in chondrocytes (Figures 6E and S4A). Importantly, intra-articular injection of LV3-miR-483-5p contributed to reduced *Timp2* level in tibial cartilage of DMM OA mice (Figure 6F). In contrast, injection of antago-miR-483-5p delayed *Timp2* loss in tibial

cartilage during OA (Figure 6G). Furthermore, *Timp2* was also significantly downregulated in DMM-induced TG483 OA mice (Figure 6H) and aged TG483 mice (Figure 6I). Together, these observations demonstrate that miR-483-5p directly limits the production of *Timp2* in chondrocytes during OA development.

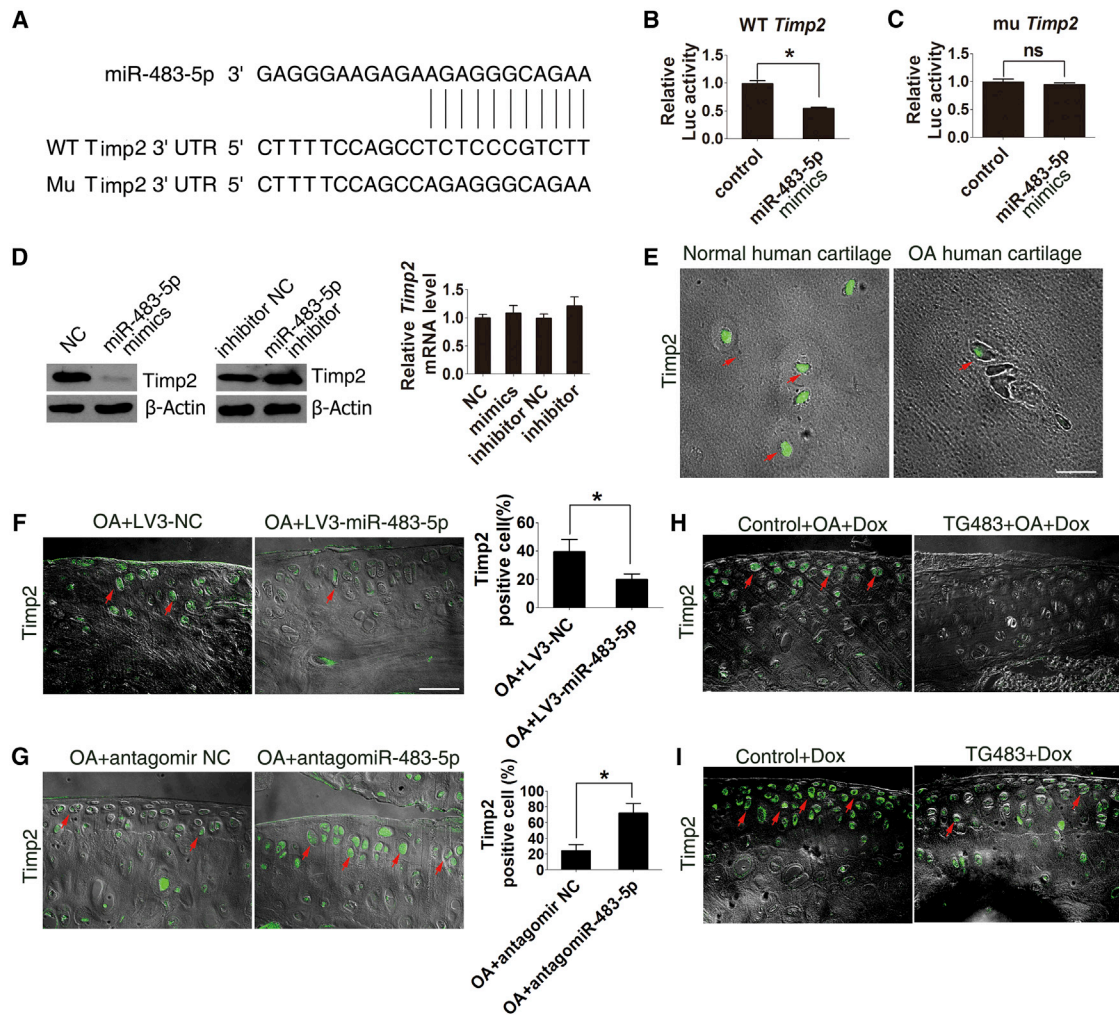

**Figure 6. miR-483-5p Directly Targets *Timp2* in Chondrocytes In Vitro and in Mice**

(A) miR-483-5p aligned with the 3' UTR of *Timp2* mRNA. (B and C) ATDC5 cells co-transfected with a reporter carrying a mutant or WT *Timp2* 3' UTR along with miR-483-5p mimics or its control were analyzed by luciferase assay. (D) Western blot and real-time PCR analysis of *Timp2* expression in ATDC5 cells transfected with miR-483-5p mimics or inhibitor. (E) Immunofluorescence analysis showed *Timp2* expression was significantly lower in cartilage from OA patients than normal controls. Scale bar, 20  $\mu$ m. (F and G) Immunofluorescence analysis of *Timp2*-positive cells in the tibial plateau of DMM OA mice after intraarticular injection of LV3-miR-483-5p (F) or antago-miR-483-5p (G) (n = 10). Scale bar, 40  $\mu$ m. (H) Immunofluorescence analysis of *Timp2*-positive cells in the tibial plateau of TG483 and control mice 5 weeks after DMM surgery. (I) Immunofluorescence analysis of *Timp2*-positive cells in the tibial plateau of TG483 and control mice treated with Dox for 12 months. Red arrows indicate positively stained cells. Error bars represent the mean  $\pm$  SEM. \*p < 0.05; \*\*p < 0.01; ns, non-significant (independent-sample t test for two groups).

Osteochondral angiogenesis and vascular invasion into the articular cartilage are critical steps for OA development in both humans and animal models. *Timp2* has been shown to prevent cartilage vascularization.<sup>29</sup> Thus, we investigated the functional role of miR-483-5p-*Timp2* in cartilage angiogenesis during OA by CD31 (endothelial progenitor) immunostaining. Interestingly, the number of blood vessels (per square millimeter) in subchondral bone marrow was significantly increased in LV3-miR-483-5p-treated DMM mice but decreased in antago-miR-483-5p-injected DMM mice relative to controls (Figure 7A). To directly assess the effect of miR-483-5p in angiogenesis, we examined the effect of miR-483-5p overexpression on tube formation in vitro. Primary chondrocytes were transfected

with miR-483-5p mimics or inhibitor and relative NC, and the culture supernatants were harvested to simulate human vascular endothelial cell (HVEC) tube formation.<sup>31</sup> Notably, total tube length of HVECs incubated with supernatant from miR-483-5p-overexpressing cells was much greater than that in the controls. In contrast, miR-483-5p inhibitor dramatically reduced total tube length (Figure 7B). These findings collectively demonstrate that upregulation of miR-483-5p in articular chondrocytes promotes angiogenesis during OA development.

Next, we examined the role of *Timp2* in angiogenesis in vitro. Primary chondrocytes were transfected with *Timp2* expression plasmid

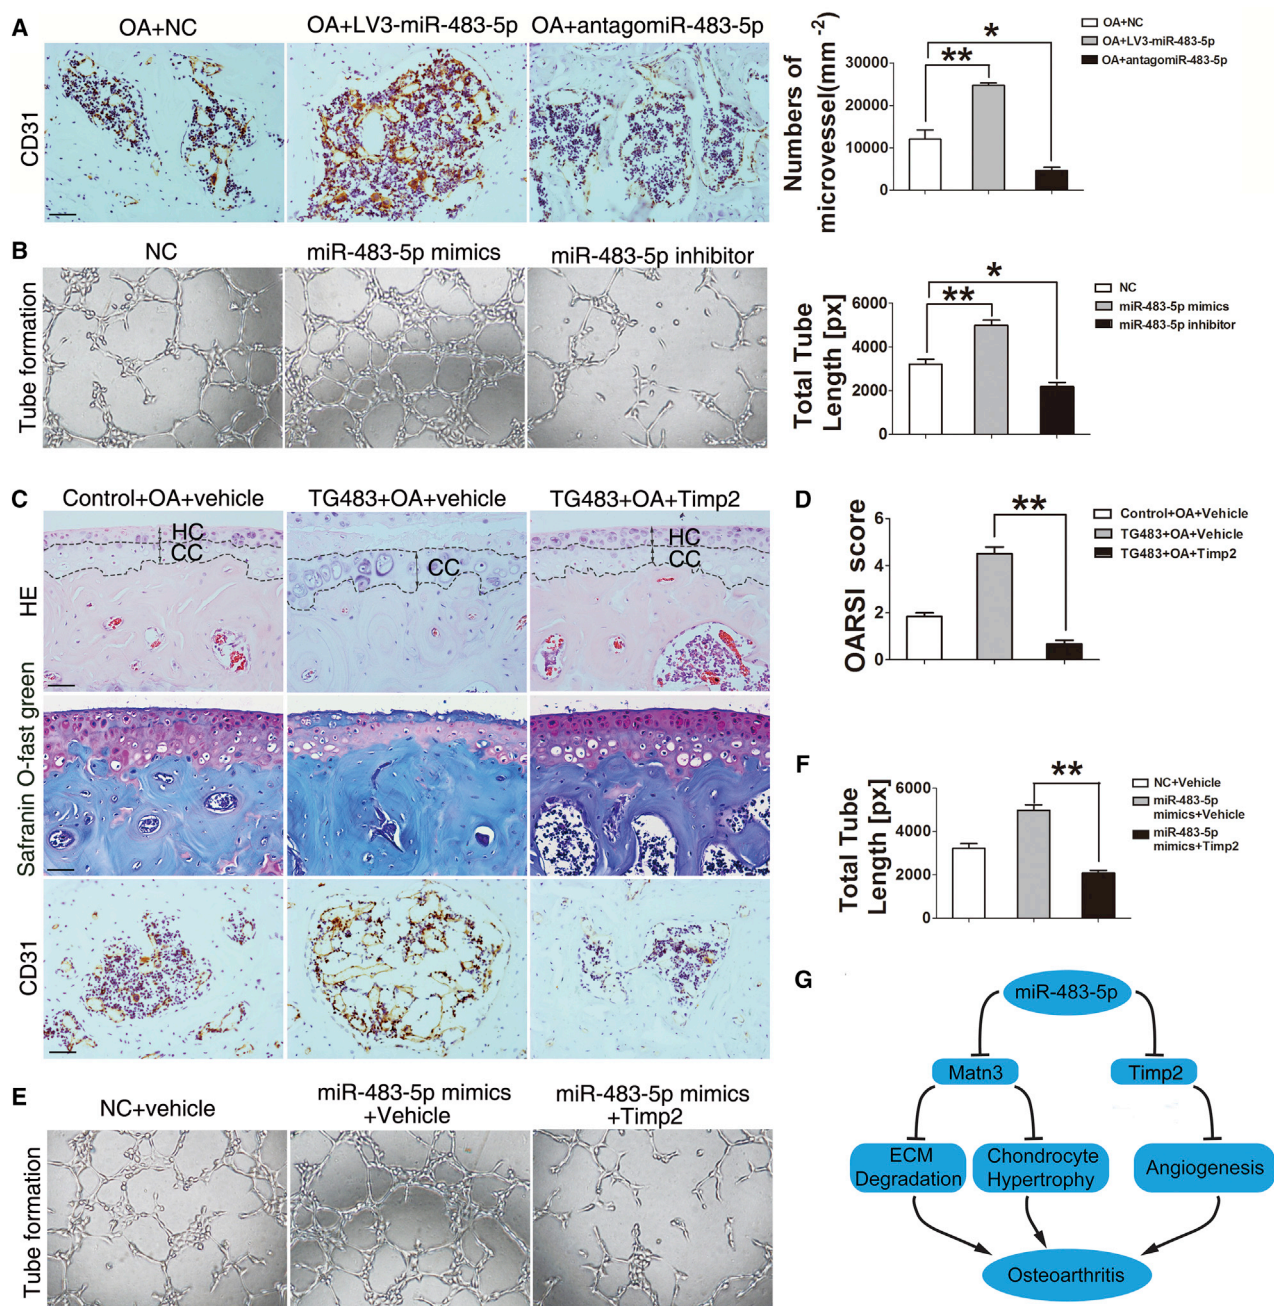

**Figure 7. miR-483-5p Downregulates Timp2 to Promote Cartilage Angiogenesis and OA Development**

(A) Immunostaining CD31 and quantification analysis of the number of blood vessels (per square millimeter) in subchondral bone marrow of DMM OA mice treated by intra-articular injection of lentivirus-mediated miR-483-5p or antago-miR-483-5p ( $n = 10$ ). Scale bar, 100  $\mu\text{m}$ . (B) HVECs were co-cultured with the supernatant from primary chondrocytes transfected with NC, miR-483-5p mimics, or inhibitor for 12 hr to form tubes, and total tube length was quantified. (C) H&E and safranin O-fast green staining in the tibial plateau and immunohistochemical analysis of the number of blood vessels (per square millimeter) in subchondral bone marrow of DMM TG483 mice with or without intra-articular injection of *Timp2*-expressing lentivirus ( $n = 10$ ). (D) OARSI scores according to safranin O and fast green staining in (C). (E) HVECs were co-cultured with the supernatant from primary chondrocytes transfected with NC, miR-483-5p mimics, or miR-483-5p mimics plus *Timp2*-expression plasmid for 12 hr and tube formation assay was performed. (F) Quantification analysis of total tube length formation in (E). (G) Graphical representation illustrating the role of the miR-483-5p-mediated pathway in the development of osteoarthritis. Error bars represent the mean  $\pm$  SEM. \* $p < 0.05$ ; \*\* $p < 0.01$  (one-way ANOVA; statistical differences between the two groups were determined by independent-samples t test).



(Figure S5A), and much less tube formation was observed when cultured with the supernatant of chondrocytes overexpressing Timp2 compared with that from the controls (Figure S5B). The function of chondrocyte Timp2 in cartilage angiogenesis and OA development was further examined in vivo. Lentivirus expressing *Timp2* siRNA (LV3-si *Timp2*) (Figure S5C) or negative control siRNA (LV3-NC) was injected intra-articularly into DMM OA mice. As expected, LV3-si *Timp2* decreased articular cartilage endogenous Timp2 (Figure S5D, top) and accelerated disease progression (Figure S5D, middle) in OA mice. Downregulation of Timp2 by LV3-si *Timp2* significantly enhanced cartilage angiogenesis in DMM OA mice (Figure S5D, bottom). These results suggest that downregulation of Timp2 may contribute to OA development through accelerating cartilage angiogenesis.

To further ascertain whether enhanced angiogenesis in cartilage of TG483 mice was due to downregulation of Timp2, 8- to 10-week-old TG483 DMM mice were treated with lentivirus expressing Timp2 by intra-articular injection. H&E, safranin O, and fast green staining showed that cartilage formation on the tibial plateau and proteoglycan in the extracellular matrix were significantly increased and, correspondingly, OARSI scores were significantly decreased in TG483 mice after Timp2-expressing lentivirus treatment (Figures 7C and 7D). Notably, the number of blood vessels was reduced in these mice (Figure 7C). Interestingly, a marked increase of miR-483-5p level was observed in cartilage, but not in bone marrow cells, from TG483 mice (Figures 4A and S5E). This might be a drawback of the rtTA tet-on system used in transgenic mice (e.g., instability), particularly the prokaryotic portion of the rtTA mRNA.<sup>32</sup> Consistently, no decrease in Timp2 expression in bone marrow cells isolated from TG483 mice was detected (Figure S5F). These results confirmed that enhanced angiogenesis of TG483 mice was due to downregulation of Timp2 in cartilage. Importantly, the ability of primary chondrocytes transfected with miR-483-5p mimics to stimulate tube formation was also reduced by overexpression of Timp2 in vitro (Figures 7E and 7F).

Based on these findings, we propose that miR-483-5p-dependent angiogenesis is restored upon re-acquisition of Timp2 expression. Taken together, these findings suggest that miR-483-5p targets Timp2 to stimulate cartilage angiogenesis and OA development.

## DISCUSSION

This study established the essential role of miRNA-483-5p in the pathogenesis and progression of OA. We propose a pathway (Figure 7G) in which miR-483-5p suppresses *Matn3* and Timp2 expression to stimulate chondrocyte hypertrophy, cartilage and ECM degradation, and cartilage angiogenesis and consequently initiates and accelerates the development of OA. Our findings demonstrated a functional pathway important for OA development and identified intra-articular injection of synthetic antago-miR-483-5p as a potential therapeutic target for OA prevention and treatment.

miRNAs are a class of non-coding single-stranded RNAs of 18–22 nt. The major role of miRNAs is to control development and tissue

homeostasis. Recently, it has been reported that miRNAs play an important role in cartilage homeostasis and OA pathogenesis. A review indicated that >25 miRNAs have been implicated in chondrogenesis and OA.<sup>33</sup> For example, miR-101, miR-145, and miR-194 participate in the regulation of chondrogenesis by targeting transcription factors in the Sox family; miR-140, miR-320c, miR-125b, and miR-27b participate in the regulation of proteolytic enzymes in OA. In this study, gain- and loss-of-function assays using intra-articular injection of lentivirus expressing miR-483-5p or antago-miR-483-5p identified the crucial role of the miRNA in OA development. Accelerated age-related or DMM-induced OA in TG483 transgenic mice further confirmed that miR-483-5p is essential for OA. Notably, we also detected the upregulation of miR-483-5p in cartilage from OA patients and OA mice. These findings collectively indicate that upregulation of miR-483-5p contributes to human OA development and miR-483-5p is a potential target for OA prevention and treatment.

Intra-articular injection of lentivirus would infect not only articular cartilage but also other joint tissues, including the synovium, meniscus, and whole joint.<sup>34</sup> Similarly, intra-articular injection of antago-miR would infect not only articular cartilage but also the synovium, which plays an important role in OA development. However, it is technically difficult to identify the role of miR-483-5p in synovium tissue, articular chondrocytes, or other cells in this model. Therefore, our study could not exclude the role of miR-483-5p in the synovium in this process, which is a limitation of the present in vivo study.

miR-483-5p is associated with several pathological conditions, including tumors such as tongue squamous cell carcinoma,<sup>19</sup> colorectal cancer,<sup>20</sup> and lung adenocarcinoma;<sup>21</sup> cartilage-associated pathologies such as osteoarthritis;<sup>22,23</sup> and bone-associated pathologies such as osteoporosis. Therefore, its targets refer to multiple pathways. Here, we identified *Matn3* and Timp2 as targets of miR-483-5p in OA development. *Matn3* is one of the four members of the matrilin family of non-collagenous oligomeric ECM proteins. Recent studies have demonstrated that *Matn3*, in addition to its structural function, acts as an important regulatory factor in maintaining the cartilage ECM microenvironment.<sup>35,36</sup> Treatment of C28/I2 cells (immortalized human chondrocytes) and primary human chondrocytes with *Matn3* protein stimulates gene expression of Col2a1 and ACAN. Deletion or mutation of the gene encoding the *Matn3* protein results in early-onset OA by causing premature chondrocyte maturation resulting in hypertrophy.<sup>37</sup> In this study, we showed that miR-483-5p could directly target *Matn3* to disrupt the stability of the cartilage ECM microenvironment. Aged TG483 transgenic mice have low levels of *Matn3* in articular cartilage and exhibit phenotypes mimicking the aged *Matn3* deletion mice, including loss of proteoglycan, cartilage degeneration, and aberrant chondrocyte hypertrophy. These interesting findings uncover a function of miR-483-5p in both the regulation of chondrocyte hypertrophy and the cartilage microenvironment.

Another target of miR-483-5p in chondrocytes is Timp2. Timp2, a member of the Timp family, has the capacity to inhibit the catalytic

activity of MMPs. However, the MMP inhibitory capacity of TIMPs appears to be low in OA cartilage.<sup>38</sup> In addition, attempts to inhibit the overproduction of MMP subtypes in OA joints by employing exogenous Timps had little clinical efficacy.<sup>39</sup> Interestingly, *Timp2* deletion mice resulted in OA-like phenotypes. Further investigation revealed that prevention of cartilage vascularization (other than repression of MMPs) contributed to its anti-OA function. Our in vitro and in vivo data confirmed the inhibitory role of *Timp2* in cartilage angiogenesis and OA development. The in vitro tube formation assay using supernatant from gain of function of *Timp2* in chondrocytes suggested that *Timp2* suppresses cartilage angiogenesis by regulating cytokine secretion in chondrocytes. The detailed mechanism by which *Timp2* suppresses cartilage angiogenesis requires further investigation.

In conclusion, our study revealed a pathway that explains the vital role of miR-483-5p in OA development. Upregulation of miR-483-5p initiates and promotes OA development by targeting *Matn3* and *Timp2* to stimulate chondrocyte hypertrophy, ECM degradation, and cartilage vascularization. Targeting of miR-483-5p by intra-articular injection of synthetic antago-miR-483-5p represents an approach to delaying OA development.

## MATERIALS AND METHODS

### Human Cartilage Specimens

Healthy human articular cartilages from both femoral condyles and tibial plateaus were obtained during surgery from victims of road traffic accidents, with no history of arthritic diseases ( $n = 4$ , age  $30.25 \pm 8.18$  years, two males and two females). In addition, we collected articular cartilages from OA patients during total knee replacement surgery ( $n = 9$ , age  $67.00 \pm 3.03$  years, one male and eight females). Patients who had OA caused by degenerative articular cartilage were included in our study (inclusion criteria). Subjects with malignancy, diabetes, or other severe diseases in the previous 5 years were excluded from our study (exclusion criteria). All samples were from the Department of Orthopedics, the Third Affiliated Hospital of Southern Medical University. All clinical procedures were approved by the Committee of Clinical Ethics in the Hospital (Guangzhou, China), and all samples were collected after informed consent.

### Generation of TG483 Transgenic Mice

The plasmid pRP.ExSi-TRE-Pri-Mir483, which contains the *pri-miR-483*, was used to generate transgenic miR-483 mice. The fragments of the *pri-miR-483* were purified and microinjected into C57BL/6J F2 mouse oocytes, and the oocytes were then surgically transferred into pseudopregnant C57BL/6J dams at Cyagen Biosciences. The expression of miR-483 is time-specifically regulated by the tet-on system. The *rtTA* (Jax no. 006965) mouse line was purchased from The Jackson Laboratory. Double-positive mice carrying both the *pri-miR-483* transgene and *rtTA* inducer allele were termed TG483 mice and used in the experiments. Experimental negative control groups consisted of mice negative for *pri-miR-483* and positive for *rtTA*, as well as mice positive for *pri-miR-483* and negative for *rtTA*. Trans-

genic founder mice were bred for three generations to obtain a defined genetic background. TG483 and control mice were treated with 2 mg/mL Dox (Sigma) drinking water from six weeks old. Genotyping, DNA extraction, PCR amplification and agarose electrophoresis were performed according to the Jackson Laboratory's instructions.

### Experimental Osteoarthritis Mouse Model

C57BL/6J WT mice were purchased from the Laboratory Animal Centre of Southern Medical University. All mice were housed in a pathogen-free animal facility at the university. Experimental OA was induced in 8- to 10-week-old male C57BL/6J and TG483 or control mice. In the DMM-induced group, the right medial collateral ligaments and anterior cruciate ligaments were dissected, followed by transection of the medial meniscus in the right knee. In the sham-operated group, only the skin of the right knee joint was resected. Animals were sacrificed at 5 weeks after knee surgery for collection of knee joint specimens. All animal experiments were approved by the Southern Medical University Committee on the Use and Care of Animals and were performed in accordance with the committee's guidelines.

### Intra-articular Injection

With regard to lentivirus (GenePharma) injection, 10  $\mu$ L lentivirus-mediated miR-483-5p (5'-AAGACGGGAGAAGAGAAGG GAG-3') ( $4 \times 10^8$  TU/ml), siTimp2 (5'-GGAATGACATCTATGG CAA-3') ( $1 \times 10^9$  TU/ml), or NC (5'-TTCTCCGAACGTGT CACGTTTC-3'), *Matn3* (NM\_010770.4) (Cyagen Biosciences), *TIMP2* (NM\_011594.3) (Cyagen Biosciences), and corresponding negative controls were injected into the knee joint<sup>34</sup> of male mice ( $n = 5$ /group) using a 33G needle and a micro-syringe (Hamilton). For the antago-miR-483-5p injection, 250  $\mu$ M antago-miR-483-5p (5'-CUCUUUCUCUCUUCUCCCGUCUU-3') or antago-mir NC (5'-UUGUACUACACAAAAGUACUG-3') (GenePharma) were injected. All experimental mice were injected on day 7 and day 14 after surgery in the OA model. Knee joints were harvested 5 weeks later.

### Isolation of Articular Cartilage

Articular cartilage was isolated following a procedure described in a previous study.<sup>26</sup> Briefly, mice were euthanized, and fur and skin were cleaned with 70% ethanol. Skin and soft tissues were removed from the hindlimbs, and the femoral head was dislocated from the acetabulum. The articular cartilage cap was removed from the femoral head using blunt-ended forceps. The femur and tibia were disarticulated and placed in a Petri dish containing cold  $1 \times$  PBS. A scalpel was used to remove the articular cartilage from the femoral condyles and tibial plateau.

### miR-483-5p Fluorescence In Situ Hybridization

The sequences of the probes (Exiqon) for mmu-miR-483-5p containing the locked nucleic acid and digoxigenin-modified bases were as follows: /5DigN/CTCCCTTCTCTTCTCCCGTCTT/3Dig\_N/. The signals were detected using fluorescein isothiocyanate (FITC) immunoglobulin G (IgG) fraction monoclonal mouse anti-digoxin (Jackson

ImmunoResearch Laboratories), coverslips were mounted using anti-fade mounting medium with DAPI (Thermo Fisher Scientific), and images were obtained using a FluoView FV1000 confocal microscope (Olympus).

#### Immunohistochemistry and Immunofluorescence staining

Specimens were prepared as described previously. For immunohistochemical analysis, we employed the following primary antibodies: rat anti-Ihh (Proteintech), rat anti-Runx2 (ABclonal, 18 F), rat anti-Matn3 (Abcam), and goat anti-CD31 (R&D Systems). Sections were stained with horseradish peroxidase (HRP)-conjugated secondary antibodies (Jackson ImmunoResearch Laboratories). For immunofluorescence, the primary antibodies used were rabbit anti-Col2a1, rabbit anti-TIMP2 (ABclonal), and mouse anti-GFP (Proteintech). For secondary reactions, a species-matched Alexa-488-labeled secondary antibody (Jackson ImmunoResearch Laboratories) was used. The sections were mounted with medium containing DAPI (Thermo Fisher Scientific), and images were obtained using a FluoView FV1000 confocal microscope (Olympus). The number of cells positive for the marker was expressed relative to the total number of cells. The number of blood vessels was also normalized to the area of subchondral bone marrow.

#### Cell Line and Primary Chondrocyte Culture, DNA Transfection, and miRNA Interference

The chondrogenic cell line ATDC5 was cultured in maintenance medium consisting of DMEM and nutrient mixture F12 (DMEM:F12; Gibco) supplemented with 5% fetal bovine serum (Gibco), 100 U/mL penicillin, and 100 mg/mL streptomycin (Gibco). The cells were maintained under standard cell culture conditions of 5% CO<sub>2</sub> and 95% humidity. Primary chondrocytes were obtained from rib cartilage of newborn mice.<sup>26</sup> *Matn3* and *Timp2* overexpression plasmid (purchased from Cyagen Biosciences) and miR-483-5p mimics and inhibitors (GenePharma) were transfected using Lipofectamine 2000 following the manufacturer's instructions (Invitrogen).

#### RNA Isolation, cDNA Synthesis, and Real-Time PCR

Total RNA was isolated from cell pellets or cartilage using TRIzol reagent (Invitrogen). RNA was stored at -80°C. To analyze miR-483-5p levels, we used the Mmu-miR-483-5p hairpin-it real-time PCR kit and the U6 snRNA real-time PCR normalization kit (GenePharma). To analyze *Col2a1* (forward primer, 5'- CACA CTGGTAAGTGGGGCAAGACCG-3'; reverse primer, 5'-GGAT TGTGTTGTTTCAGGGTTCGGG-3'), *Ihh* (forward primer, 5'-CCA CTTCCGGGCCACATTTG-3'; reverse primer, 5'- GGCCACCA CATCCTCCACCA-3'), *Matn3* (forward primer, 5'-TCCCGCAT CATCGACACTCTG-3'; reverse primer, 5'-CCC GGCCCTCCACA GTGAAG-3'), *Timp2* (forward primer, 5'- CCCCTCTTCAGCA GTG-3'; reverse primer, 5'- GCGTGTCCCAGGGCACAATGA-3'), and *Gapdh* (forward primer, 5'- AAATGGTGAAGGTCGGTGT GAAC-3'; reverse primer, 5'- CAACAATCTCCACTTTGCCA CTG-3') levels, we used Takara reverse transcription reagents and Real-Time PCR Mix (Takara Bio) on the LightCycler (Roche). The

*U6* and *Gapdh* genes were used as endogenous controls to normalize for differences in the amount of total miRNA and RNA.

#### Luciferase Assay

*Matn3* and *Timp2* mRNA 3' UTR containing the miR-483-5p-binding sequences for the mouse *Matn3* gene (GenBank: NM\_010770) and *Timp2* gene (GenBank: NM\_011594) were amplified by PCR from mouse cDNA. The fragment of *Matn3* mRNA 3' UTR was amplified by forward primer 5'-CCGCTCGAGCTG GCTATGAACTTATGGTGC-3' and reverse primer 5'-AAGGAAA AAAAGCGCCGCTAGCTCAAGCACATGCACAC-3'. The fragment of *Timp2* mRNA 3' UTR was amplified by forward primer 5'-CCGCTCGAGTCTTGTGCCGTGTTGATGC-3' and reverse primer 5'- AAGGAAAAAGCGGCCGCAAAGGTTTCGTTTGCTC GCTC-3'. The PCR product was then subcloned into the XhoI and NotI (Thermo Fisher Scientific) cloning sites of psiCHECK-2 empty vector (Promega). Binding-region mutations were achieved using the primers as follows: *Matn3*-mu-forward primer, 5'- GTTGGGCA GATTCTACATTAAC-3'; reverse primer, 5'-GTAGAATCTGCC CAACTTTTA-3'; *Timp2* -mu-forward primer, 5'- CAGAGGGCA GAATTGTATC-3'; reverse primer 5'- ATTCTGCCCTCTGGCTG GAAAAG-3'. The cells were co-transfected with miR-483-5p mimics or negative control, and luciferase assays were performed with the dual-luciferase reporter assay system (Promega) according to the manufacturer's instructions. Luminescent signals were quantified by a luminometer (Glomax, Promega).

#### Western Blot Analysis

After treatment, the cells were lysed immediately for 5 min at 95°C in buffer (62.5 mM Tris-HCl [pH 6.8], 10% glycerol, 2% SDS, 50 mM DTT, and 0.01% bromophenol blue). Cell lysates were analyzed by SDS-PAGE and transferred to a nitrocellulose (NC) membrane (Bio-Rad). Blots were probed with primary antibodies *Matn3* and *Timp2*, and immunoreactive proteins were revealed using the enhanced chemiluminescence kit (Santa Cruz Biotechnology).

#### Tube-Formation Assays

The protocol for tube formation assays in our lab has been described previously.<sup>31</sup> Briefly, 96-well culture plates were coated with 20 µL of growth factor-reduced Matrigel (BD Biosciences) and solidified for 30 min at 37°C. HVECs were trypsinized and resuspended in supernatant from cells with *Timp2* overexpression at a density of 5 × 10<sup>4</sup>/mL, and 100 µL of this cell suspension was added to each well. After incubation at 37°C for 12 hr, tube formation was observed under an inverted microscope. Tube length was measured using ImageJ version 1.31 (NIH).

#### Statistics

All numerical data are presented as the mean ± SEM. The significance of differences between two groups was determined by an independent-samples t test. The one-sample t test was performed to determine statistical differences between two groups in the real-time PCR analysis. In Figure 7, a one-way ANOVA was used (\*p < 0.05; \*\*p < 0.01; ns, non-significant). p < 0.05 was considered statistically

significant. All statistical analyses were performed with SPSS software (version 13.0).

#### SUPPLEMENTAL INFORMATION

Supplemental Information includes five figures and can be found with this article online at <http://dx.doi.org/10.1016/j.ymthe.2016.12.020>.

#### AUTHOR CONTRIBUTIONS

X.B. conceived the project and designed the experiments; H.W., H.Z., and Q.S. performed experiments; all authors analyzed data; X.B. and H.W. wrote the manuscript; and X.B., C.Z., and D.C. supervised the project.

#### CONFLICTS OF INTEREST

The authors declare no competing financial interests.

#### ACKNOWLEDGMENTS

This work was supported by grants from the National Natural Sciences Foundation of China (81530070, 81625015, 31529002, U1301222, 81301525, and 81672120) and the Science and Technology Program of Guangzhou, China (201607010081).

#### REFERENCES

- van der Kraan, P.M., and van den Berg, W.B. (2012). Chondrocyte hypertrophy and osteoarthritis: role in initiation and progression of cartilage degeneration? *Osteoarthritis Cartilage* 20, 223–232.
- Sun, M.M., and Beier, F. (2014). Chondrocyte hypertrophy in skeletal development, growth, and disease. *Birth Defects Res. C Embryo Today* 102, 74–82.
- Suri, S., and Walsh, D.A. (2012). Osteochondral alterations in osteoarthritis. *Bone* 51, 204–211.
- Zhen, G., Wen, C., Jia, X., Li, Y., Crane, J.L., Mears, S.C., Askin, F.B., Frassica, F.J., Chang, W., Yao, J., et al. (2013). Inhibition of TGF- $\beta$  signaling in mesenchymal stem cells of subchondral bone attenuates osteoarthritis. *Nat. Med.* 19, 704–712.
- Kronenberg, H.M. (2003). Developmental regulation of the growth plate. *Nature* 423, 332–336.
- Bartel, D.P. (2004). MicroRNAs: genomics, biogenesis, mechanism, and function. *Cell* 116, 281–297.
- Miyaki, S., Sato, T., Inoue, A., Otsuki, S., Ito, Y., Yokoyama, S., Kato, Y., Takemoto, F., Nakasa, T., Yamashita, S., et al. (2010). MicroRNA-140 plays dual roles in both cartilage development and homeostasis. *Genes Dev.* 24, 1173–1185.
- Tardif, G., Hum, D., Pelletier, J.-P., Duval, N., and Martel-Pelletier, J. (2009). Regulation of the IGFBP-5 and MMP-13 genes by the microRNAs miR-140 and miR-27a in human osteoarthritic chondrocytes. *BMC Musculoskelet. Disord.* 10, 148.
- Ukai, T., Sato, M., Akutsu, H., Umezawa, A., and Mochida, J. (2012). MicroRNA-199a-3p, microRNA-193b, and microRNA-320c are correlated to aging and regulate human cartilage metabolism. *J. Orthop. Res.* 30, 1915–1922.
- Matsukawa, T., Sakai, T., Yonezawa, T., Hiraiwa, H., Hamada, T., Nakashima, M., Ono, Y., Ishizuka, S., Nakahara, H., Lotz, M.K., et al. (2013). MicroRNA-125b regulates the expression of aggrecanase-1 (ADAMTS-4) in human osteoarthritic chondrocytes. *Arthritis Res. Ther.* 15, R28.
- Akhtar, N., Rasheed, Z., Ramamurthy, S., Anbazhagan, A.N., Voss, F.R., and Haqqi, T.M. (2010). MicroRNA-27b regulates the expression of matrix metalloproteinase 13 in human osteoarthritis chondrocytes. *Arthritis Rheum.* 62, 1361–1371.
- Xu, J., Kang, Y., Liao, W.M., and Yu, L. (2012). MiR-194 regulates chondrogenic differentiation of human adipose-derived stem cells by targeting Sox5. *PLoS ONE* 7, e31861.
- Akhtar, N., and Haqqi, T.M. (2012). MicroRNA-199a\* regulates the expression of cyclooxygenase-2 in human chondrocytes. *Ann. Rheum. Dis.* 71, 1073–1080.
- Abouheif, M.M., Nakasa, T., Shibuya, H., Niimoto, T., Kongcharoensombat, W., and Ochi, M. (2010). Silencing microRNA-34a inhibits chondrocyte apoptosis in a rat osteoarthritis model in vitro. *Rheumatology (Oxford)* 49, 2054–2060.
- Jin, L., Zhao, J., Jing, W., Yan, S., Wang, X., Xiao, C., and Ma, B. (2014). Role of miR-146a in human chondrocyte apoptosis in response to mechanical pressure injury in vitro. *Int. J. Mol. Med.* 34, 451–463.
- Ferland-McCollough, D., Fernandez-Twinn, D.S., Cannell, I.G., David, H., Warner, M., Vaag, A.A., Bork-Jensen, J., Brøns, C., Gant, T.W., Willis, A.E., et al. (2012). Programming of adipose tissue miR-483-3p and GDF-3 expression by maternal diet in type 2 diabetes. *Cell Death Differ.* 19, 1003–1012.
- Kulyté, A., Lorente-Cebrián, S., Gao, H., Mejhert, N., Agustsson, T., Arner, P., Rydén, M., and Dahlman, I. (2014). MicroRNA profiling links miR-378 to enhanced adipocyte lipolysis in human cancer cachexia. *Am. J. Physiol. Endocrinol. Metab.* 306, E267–E274.
- Mohan, R., Mao, Y., Zhang, S., Zhang, Y.W., Xu, C.R., Gradwohl, G., and Tang, X. (2015). Differentially expressed microRNA-483 confers distinct functions in pancreatic beta- and alpha-cells. *J. Biol. Chem.* 290, 19955–19966.
- Fan, S., Chen, W.X., Lv, X.B., Tang, Q.L., Sun, L.J., Liu, B.D., Zhong, J.L., Lin, Z.Y., Wang, Y.Y., Li, Q.X., et al. (2015). miR-483-5p determines mitochondrial fission and cisplatin sensitivity in tongue squamous cell carcinoma by targeting FIS1. *Cancer Lett.* 362, 183–191.
- Loo, J.M., Scherl, A., Nguyen, A., Man, F.Y., Weinberg, E., Zeng, Z., Saltz, L., Paty, P.B., and Tavazoie, S.F. (2015). Extracellular metabolic energetics can promote cancer progression. *Cell* 160, 393–406.
- Song, Q., Xu, Y., Yang, C., Chen, Z., Jia, C., Chen, J., Zhang, Y., Lai, P., Fan, X., Zhou, X., et al. (2014). miR-483-5p promotes invasion and metastasis of lung adenocarcinoma by targeting RhoGDI1 and ALCAM. *Cancer Res.* 74, 3031–3042.
- Díaz-Prado, S., Cicione, C., Muiños-López, E., Hermida-Gómez, T., Oreiro, N., Fernández-López, C., and Blanco, F.J. (2012). Characterization of microRNA expression profiles in normal and osteoarthritic human chondrocytes. *BMC Musculoskelet. Disord.* 13, 144–157.
- Yang, M., Zhang, L., and Gibson, G.J. (2015). Chondrocyte miRNAs 221 and 483-5p respond to loss of matrix interaction by modulating proliferation and matrix synthesis. *Connect. Tissue Res.* 56, 236–243.
- Qi, Y., Ma, N., Yan, F., Yu, Z., Wu, G., Qiao, Y., Han, D., Xiang, Y., Li, F., Wang, W., and Gao, X. (2013). The expression of intronic miRNAs, miR-483 and miR-483\*, and their host gene, *Igf2*, in murine osteoarthritis cartilage. *Int. J. Biol. Macromol.* 61, 43–49.
- Huang, M.J., Wang, L., Jin, D.D., Zhang, Z.M., Chen, T.Y., Jia, C.H., Wang, Y., Zhen, X.C., Huang, B., Yan, B., et al. (2014). Enhancement of the synthesis of n-3 PUFAs in fat-1 transgenic mice inhibits mTORC1 signalling and delays surgically induced osteoarthritis in comparison with wild-type mice. *Ann. Rheum. Dis.* 73, 1719–1727.
- Jonason, J.H., Hoak, D., and O'Keefe, R.J. (2015). Primary murine growth plate and articular chondrocyte isolation and cell culture. *Methods Mol. Biol.* 1226, 11–18.
- Glasson, S.S., Chambers, M.G., Van Den Berg, W.B., and Little, C.B. (2010). The OARSI histopathology initiative - recommendations for histological assessments of osteoarthritis in the mouse. *Osteoarthritis Cartilage* 18 (Suppl 3), S17–S23.
- Yang, X., Trehan, S.K., Guan, Y., Sun, C., Moore, D.C., Jayasuriya, C.T., and Chen, Q. (2014). Matrilin-3 inhibits chondrocyte hypertrophy as a bone morphogenetic protein-2 antagonist. *J. Biol. Chem.* 289, 34768–34779.
- Mi, M., Shi, S., Li, T., Holz, J., Lee, Y.J., Sheu, T.J., Liao, Q., and Xiao, T. (2012). TIMP2 deficient mice develop accelerated osteoarthritis via promotion of angiogenesis upon destabilization of the medial meniscus. *Biochem. Biophys. Res. Commun.* 423, 366–372.
- Li, F., Ma, N., Zhao, R., Wu, G., Zhang, Y., Qiao, Y., Han, D., Xu, Y., Xiang, Y., Yan, B., et al. (2014). Overexpression of miR-483-5p/3p cooperate to inhibit mouse liver fibrosis by suppressing the TGF- $\beta$  stimulated HSCs in transgenic mice. *J. Cell. Mol. Med.* 18, 966–974.
- Wen, Z.H., Su, Y.C., Lai, P.L., Zhang, Y., Xu, Y.F., Zhao, A., Yao, G.Y., Jia, C.H., Lin, J., Xu, S., et al. (2013). Critical role of arachidonic acid-activated mTOR signaling in breast carcinogenesis and angiogenesis. *Oncogene* 32, 160–170.

32. Urlinger, S., Baron, U., Thellmann, M., Hasan, M.T., Bujard, H., and Hillen, W. (2000). Exploring the sequence space for tetracycline-dependent transcriptional activators: novel mutations yield expanded range and sensitivity. *Proc. Natl. Acad. Sci. USA* *97*, 7963–7968.
33. Wu, C., Tian, B., Qu, X., Liu, F., Tang, T., Qin, A., Zhu, Z., and Dai, K. (2014). MicroRNAs play a role in chondrogenesis and osteoarthritis (review). *Int. J. Mol. Med.* *34*, 13–23.
34. Zhu, S., Dai, J., Liu, H., Cong, X., Chen, Y., Wu, Y., Hu, H., Heng, B.C., Ouyang, H.W., and Zhou, Y. (2015). Down-regulation of Rac GTPase-activating protein OCRL1 causes aberrant activation of Rac1 in osteoarthritis development. *Arthritis Rheumatol.* *67*, 2154–2163.
35. Pei, M., Luo, J., and Chen, Q. (2008). Enhancing and maintaining chondrogenesis of synovial fibroblasts by cartilage extracellular matrix protein matrilins. *Osteoarthritis Cartilage* *16*, 1110–1117.
36. Jayasuriya, C.T., Goldring, M.B., Terek, R., and Chen, Q. (2012). Matrilin-3 induction of IL-1 receptor antagonist is required for up-regulating collagen II and aggrecan and down-regulating ADAMTS-5 gene expression. *Arthritis Res. Ther.* *14*, R197.
37. van der Weyden, L., Wei, L., Luo, J., Yang, X., Birk, D.E., Adams, D.J., Bradley, A., and Chen, Q. (2006). Functional knockout of the matrilin-3 gene causes premature chondrocyte maturation to hypertrophy and increases bone mineral density and osteoarthritis. *Am. J. Pathol.* *169*, 515–527.
38. Meszaros, E., and Malemud, C.J. (2012). Prospects for treating osteoarthritis: enzyme–protein interactions regulating matrix metalloproteinase activity. *Ther. Adv. Chronic Dis.* *3*, 219–229.
39. Clutterbuck, A.L., Asplin, K.E., Harris, P., Allaway, D., and Mobasheri, A. (2009). Targeting matrix metalloproteinases in inflammatory conditions. *Curr. Drug Targets* *10*, 1245–1254.

YMTHE, Volume 25

## **Supplemental Information**

**Intra-articular Delivery of Antago-miR-483-5p**

**Inhibits Osteoarthritis by Modulating Matrilin 3**

**and Tissue Inhibitor of Metalloproteinase 2**

**Hua Wang, Haiyan Zhang, Qiuyi Sun, Yun Wang, Jun Yang, Jincheng Yang, Tao Zhang, Shenqiu Luo, Liping Wang, Yu Jiang, Chun Zeng, Daozhang Cai, and Xiaochun Bai**

## SUPPLEMENTARY FIGURE LEGENDS

**Supplementary Figure S1. Histologic staining of OA cartilage.** (a) Safranin O-fast green staining of human normal and OA cartilage. Bar = 50  $\mu\text{m}$ .

**Supplementary Figure S2. AntagomiR-483-5p decreased miR-483-5p levels in chondrocytes and synovium.** (a) Immunofluorescence analysis of GFP expression in the tibial plateau of mice intra-articularly injected with LV3-NC or control (n = 10). Bar = 40  $\mu\text{m}$ . (b) Fluorescence *in situ* hybridization analysis of miR-483-5p levels in the articular cartilage (upper, Bar = 40  $\mu\text{m}$ ) and synovium (bottom, Bar = 120  $\mu\text{m}$ ) of mice injected with antagomiR-483-5p or antagomiR NC after DMM surgery. (c) Quantification of the proportion of positive cells for miR-483-5p in the articular cartilage of mice shown in (b). Error bars represent the mean  $\pm$ SEM. \* $P < 0.05$  by independent-sample *t* test for two groups.

**Supplementary Figure S3. Generation and identification of TG483 mice in genotype.** (a) Schematic representation of the generation of TG483 mice. (b, c) Genomic DNA from tails of mice was subjected to PCR using the indicated primer pairs. Primers miR-483-forward and miR-483-reverse detected a 416 bp product of pri-miR-483 (b). Primers wild type and common detected a 650 bp product from wild-type rTA DNA, whereas primers mutant and common detected a 340 bp mutant fragment (c). The migration positions of expected DNA products and mass standards in bp are shown to the left and right sides of the gels, respectively. DNA was detected by ethidium bromide staining.

**Supplementary Figure S4. Expression of Timp2 was down-regulated in human OA cartilage.** (a) Immunofluorescence analysis of Timp2 in knee joints from OA and normal human articular cartilage. Red arrows indicate positively-stained cells. Bar = 120  $\mu\text{m}$ .

**Supplementary Figure S5. Downregulation of Timp2 may contribute to OA development through accelerating cartilage angiogenesis.** (a) Western blot analysis of Timp2 in primary chondrocytes infected with *Timp2* expression plasmid and control plasmid for 96 h. (b) HVECs were co-cultured with the supernatant from primary chondrocytes infected with *Timp2* expression plasmid and control plasmid for 12 h and tube formation assay was performed. (c) Western blot analysis of Timp2 in ATDC5 cells infected with LV3-si*Timp2* and control LV3-NC for 96 h. (d) Immunofluorescence analysis of Timp2 (upper, Bar = 40  $\mu$ m), safranin O-fast green staining (middle, Bar = 40  $\mu$ m) and immunohistochemical analysis of CD31 (bottom, Bar = 100  $\mu$ m) in the knee joints from DMM OA mice injected intra-articularly with LV3-si*Timp2* or LV3-NC. (e) Real-time PCR analysis of miR-483-5p level in bone marrow cells (normalized to those in WT mice) from control and TG483 mice exposed to Dox for two weeks. (f) Western blot analysis of Timp2 expression in bone marrow cells from mice shown in (e). Red arrows indicate positively stained cells. Black arrows indicate the tidemark. Error bars represent the mean  $\pm$ SEM. \*\* $P < 0.01$  by independent-sample t test for two groups.



**a** Normal human cartilage    OA human cartilage

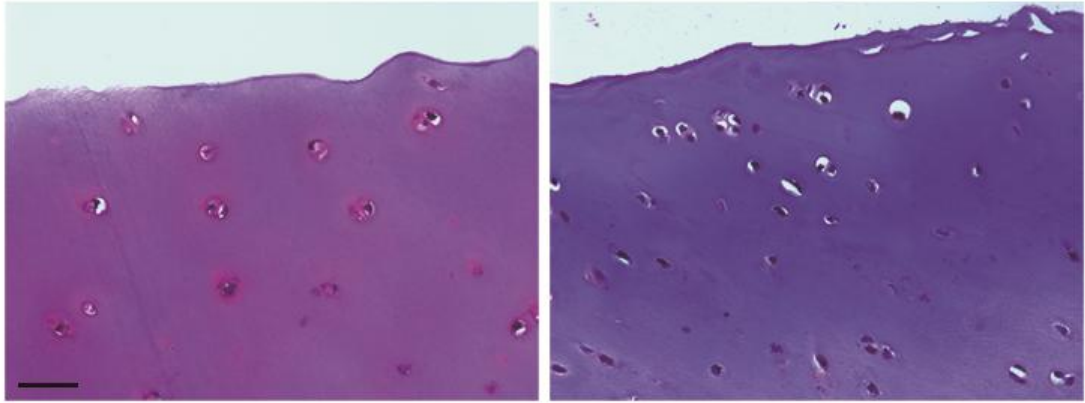

**Supplementary Figure S1. Histologic staining of OA cartilage.**

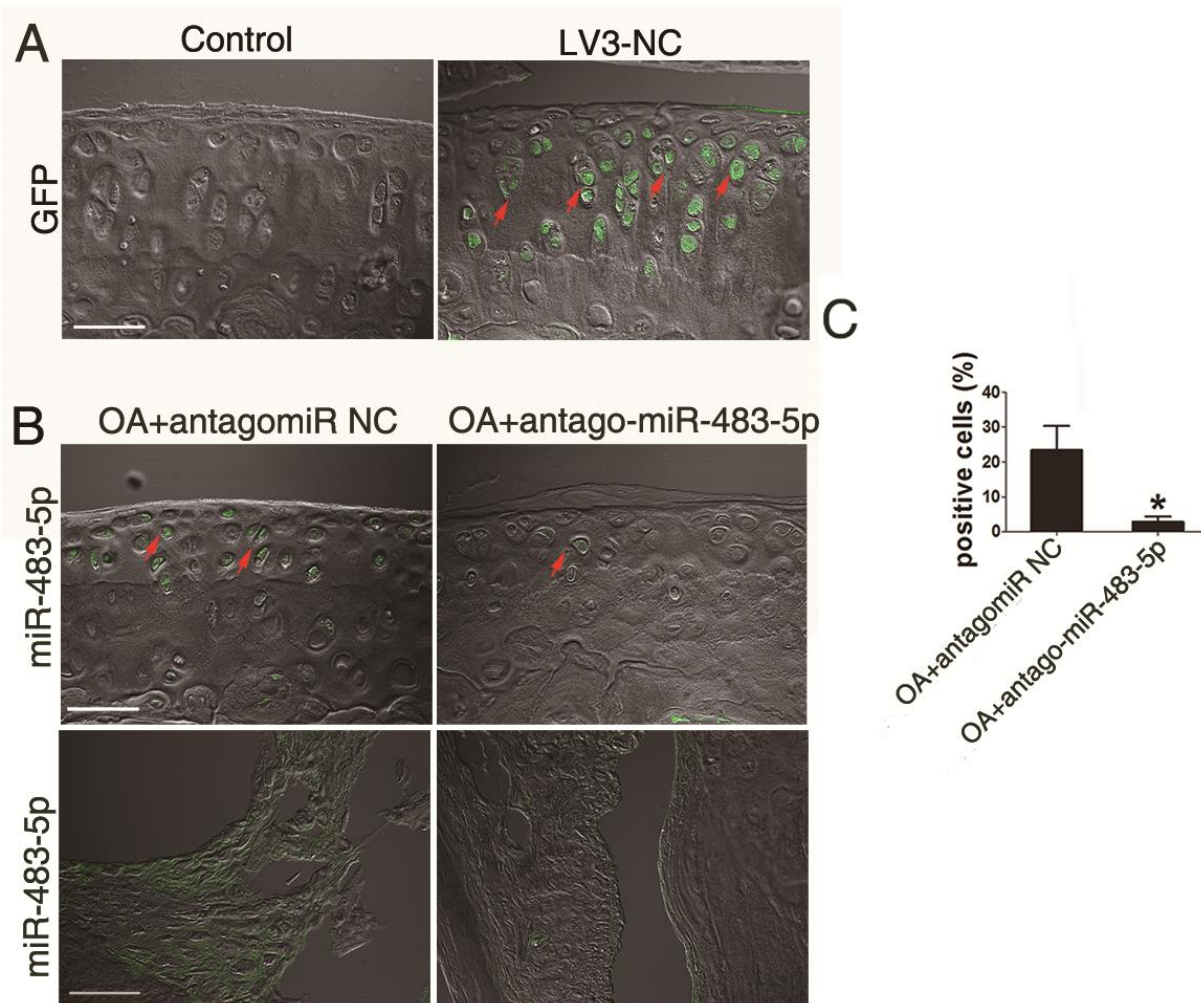

**Supplementary Figure S2. AntagomiR-483-5p decreased miR-483-5p levels in chondrocytes and synovium.**

a

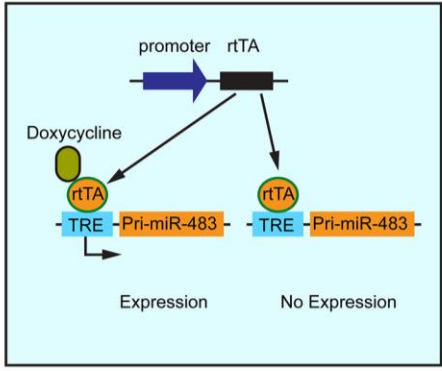

b

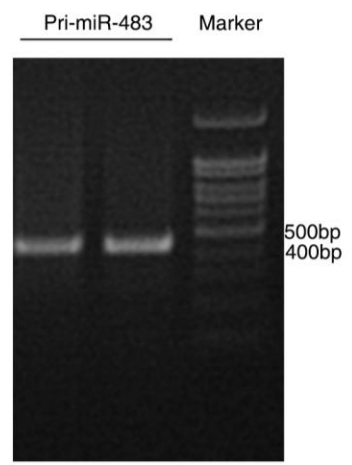

c

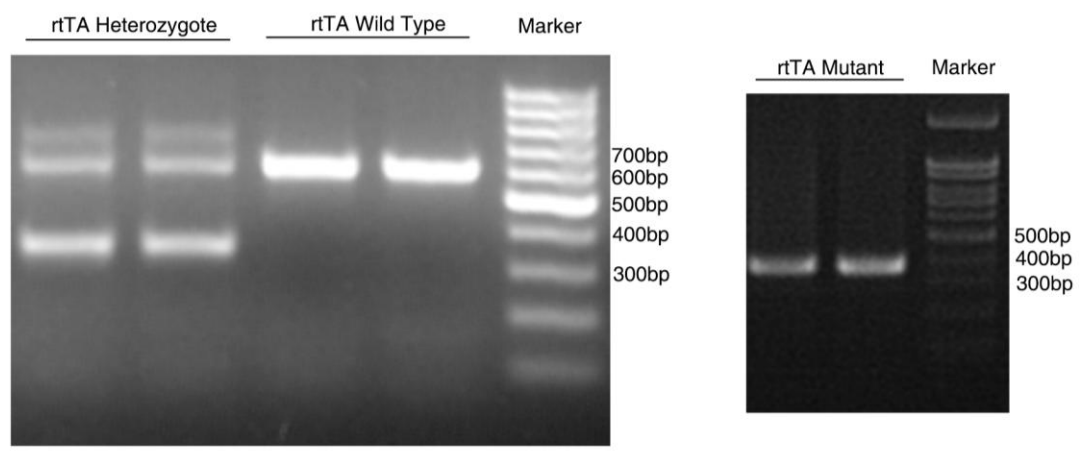

Supplementary Figure S3. Generation and identification of TG483 mice in genotype.

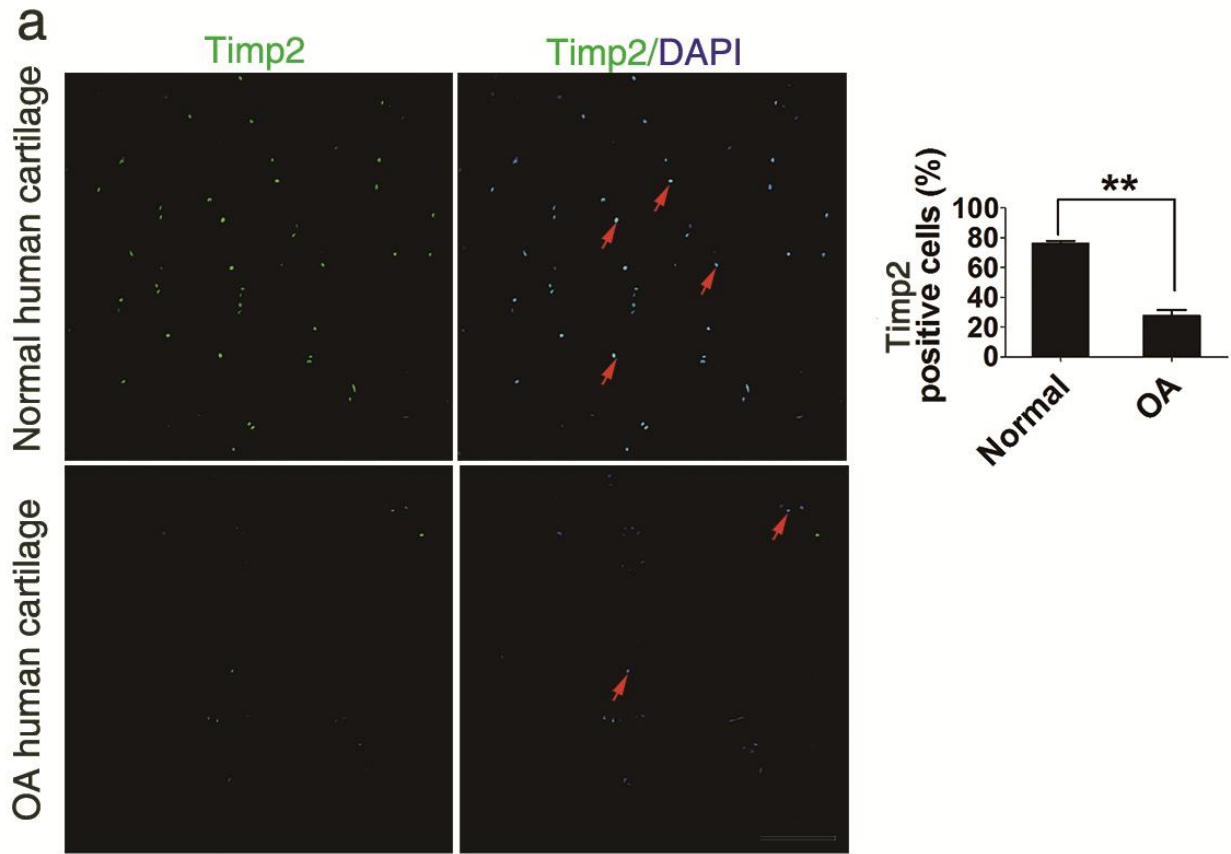

**Supplementary Figure S4. Expression of Timp2 was down-regulated in human OA cartilage.**

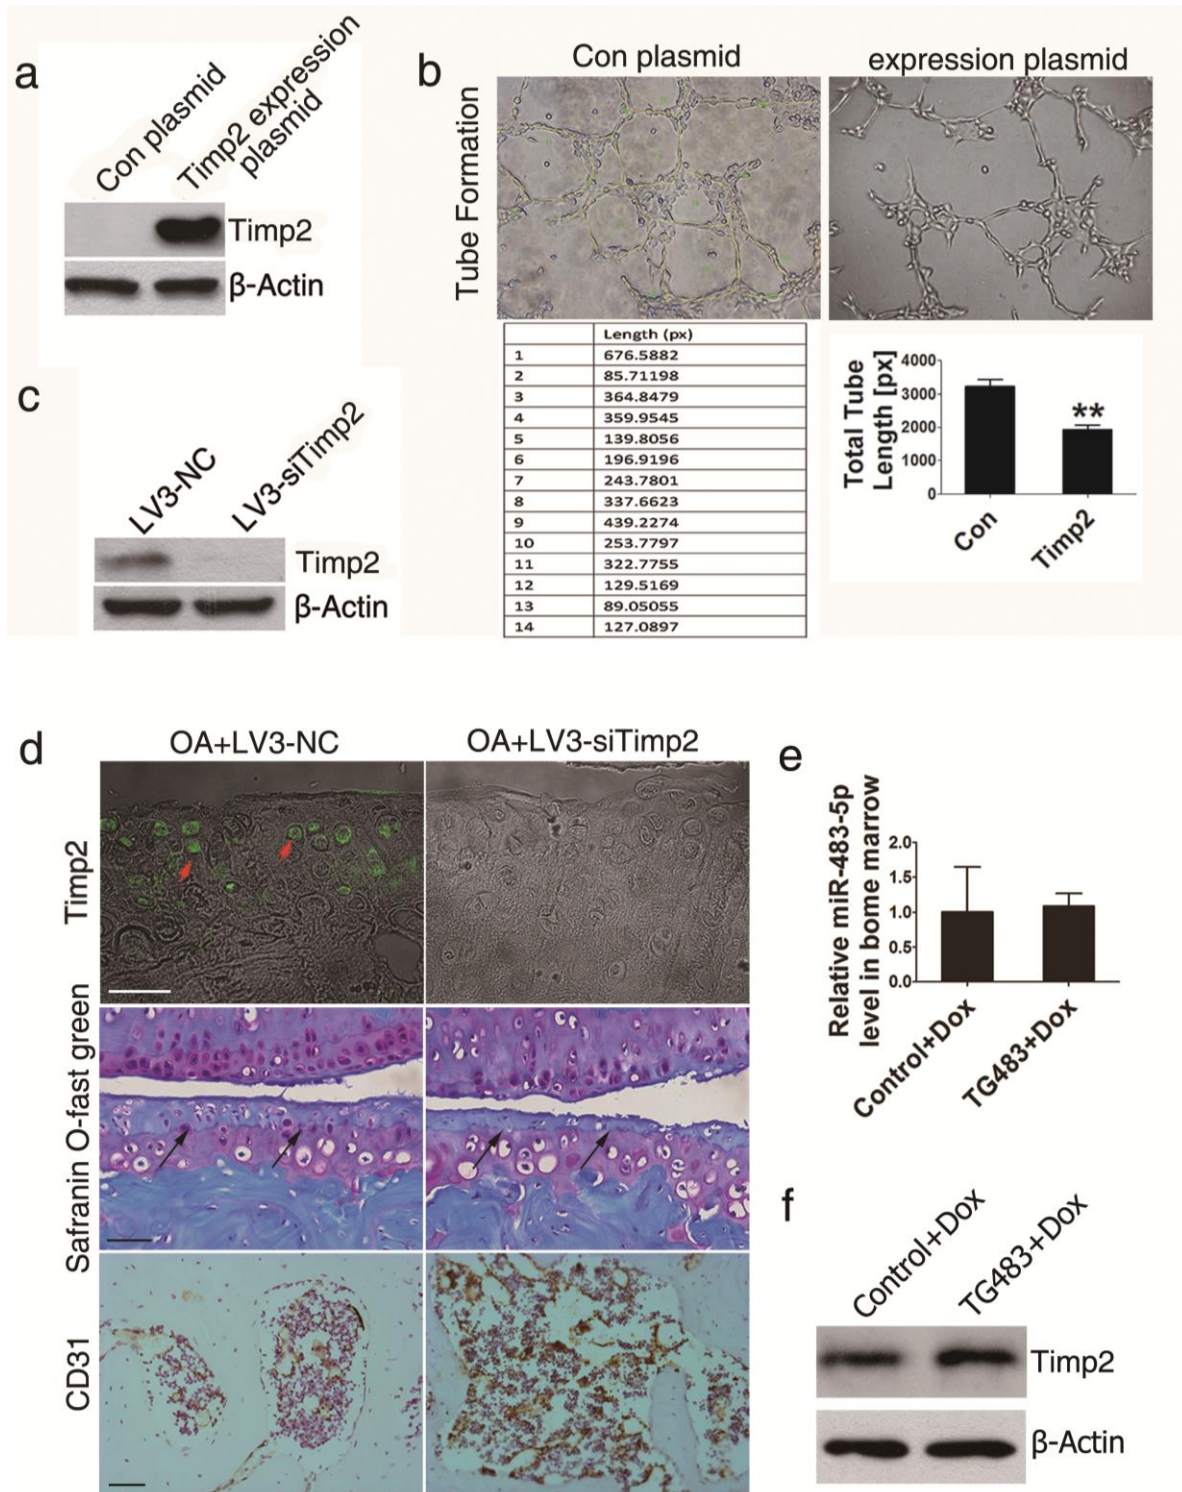

**Supplementary Figure S5. Downregulation of Timp2 may contribute to OA development through accelerating cartilage angiogenesis.**
